# Supplementary material
Source: PubMed Central journal article supplement (PMC4180299)
Supplement: Supp_Figure1.pdf [file Supp_Figure1.pdf]

## Supplementary Data

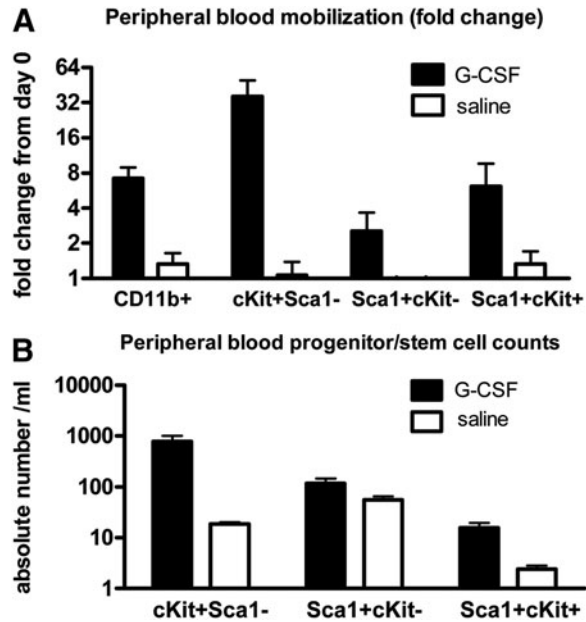

**SUPPLEMENTARY FIG. S1.** Effect of G-CSF mobilization protocols on circulating stem and progenitor cells in peripheral blood of *Il2rg*<sup>-/-</sup> mice. **(A)** The fold change in the absolute numbers of myeloid and stem cell marker-positive cells measured in peripheral blood after treatment with mobilization factor G-CSF compared with the numbers before mobilization. **(B)** The absolute numbers of c-Kit<sup>+</sup>, Sca-1<sup>+</sup>, and c-Kit<sup>+</sup>Sca-1<sup>+</sup> cells after mobilization. Data contain the combined results of two experiments. G-CSF, granulocyte colony-stimulating factor.
